# Supplementary material for: Disease evolution in mixed connective tissue disease: results from a long-term nationwide prospective cohort study
Source: Springer Nature journal article supplement (doi:10.1186/s13075-017-1494-7), 2017-12-01
Supplement: MOESM1 [file 15327370]

**Additional file 1:** Clinical and laboratory features in the patients evolving into another specific rheumatic condition

| Case | Time point 1                                                                                                                                         | Time point 2                                                                                                                                                   |
|------|------------------------------------------------------------------------------------------------------------------------------------------------------|----------------------------------------------------------------------------------------------------------------------------------------------------------------|
| 1    | RP, puffy hands, arthritis, leukopenia                                                                                                               | Arthritis <sup>1</sup> , elevated CK, DLCO % pred < 70 <sup>2</sup> , strongly positive anti-dsDNA and anti-SSA, low C3 and C4, negative anti-RNP              |
| 2    | RP, puffy hands, pericarditis, pleuritis, leukopenia, oesophageal dysmotility, facial erythema                                                       | RP, pericarditis, puffy hands, sclerodactyly, oesophageal dysmotility, arthritis, positive anti-dsDNA and anti-RNP, low C3 and C4                              |
| 3    | RP, puffy hands, arthritis, lymphadenitis, facial erythema, leukopenia, oesophageal dysmotility                                                      | RP, puffy hands, arthritis, lymphadenitis, facial erythema, leukopenia, thrombocytopenia, nephritis, positive anti-dsDNA, anti-SSA and anti-RNP, low C3 and C4 |
| 4    | RP, puffy hands, arthritis - facial erythema, digital ulcers, muscle weakness, lymphadenopathy, ILD                                                  | RP, puffy hands, arthritis, lymphadenopathy, alopecia, ILD, strongly positive anti-dsDNA, anti-Sm, anti-SSA and anti-RNP, low C3 and C4                        |
| 5    | RP, facial erythema, arthritis, leukopenia, oesophageal dysmotility                                                                                  | RP, arthritis, oesophageal dysmotility, anaemia, pericarditis, pleuritic, positive anti-RNP, strongly positive anti-dsDNA and anti-SSA, low C3 and C4          |
| 6    | RP, puffy hands, leukopenia, anaemia, arthritis, facial erythema, lymphadenopathy                                                                    | RP, puffy hands - DLCO % pred < 70 <sup>2</sup> , leukopenia, positive anti-RNP, strongly positive anti-dsDNA, low C3 and C4                                   |
| 7    | RP, puffy hands, leukopenia, anaemia, arthritis                                                                                                      | RP, arthritis, bone erosion, negative anti-RNP, strongly positive ACPA                                                                                         |
| 8    | RP, arthritis, leukopenia, puffy hands, anaemia                                                                                                      | Bone erosion, arthritis, strongly positive ACPA, negative ANA                                                                                                  |
| 9    | RP, facial erythema, alopecia, elevated CK, arthritis                                                                                                | RP, elevated CK, bone erosion, arthritis, strongly positive ACPA, negative ANA                                                                                 |
| 10   | RP, muscle weakness, facial erythema, alopecia, arthritis                                                                                            | RP, arthritis, bone erosions, negative RNP, strongly positive ACPA and RF IgM                                                                                  |
| 11   | RP, arthritis, alopecia, sclerodactyly, myositis                                                                                                     | RP, MALT-lymphoma, arthritis, lymphadenopathy, sclerodactyly, IL, negative anti-RNP, strongly positive ACA, anti-SSB and anti-SSA, positive anti-Jo1           |
| 12   | RP, DLCO % pred < 70 <sup>2</sup> , puffy hands, sclerodactyly, arthritis, digital ulcers                                                            | RP, puffy hands, sclerodactyly, digital ulcers, DLCO % pred < 70, strongly positive ACA, positive anti-RNP                                                     |
| 13   | RP, oesophageal dysmotility, puffy hands, sclerodactyly, alopecia, arthritis, facial erythema, digital ulcers, muscle weakness, lymphadenopathy, ILD | RP, puffy hands, sclerodactyly, muscle weakness, lymphadenopathy, ILD, strongly positive ACA, positive anti-Scl70, negative anti-RNP                           |
| 14   | RP, puffy hands, arthritis, oesophageal dysmotility, myositis, ILD                                                                                   | Myositis, puffy hands, oesophageal dysmotility, arthritis, ILD, bone erosion, strongly positive anti-Jo1, positive anti-SSA and anti-RNP                       |

<sup>1</sup> no bone erosions on hand X-ray, <sup>2</sup> no ILD on CT, RP: Raynaud's phenomenon, ILD: Interstitial Lung Disease, SSc: Systemic sclerosis, ASS: Antisynthetase Syndrome, SLE: Systemic Lupus Erythematosus, anti-Jo1: anti-histidyl-tRNA synthetase, anti-SSA: anti-Sjögrens Syndrome antigen A, anti-SSB: anti-Sjögrens Syndrome antigen B, ACA: anti-centromere protein-B, anti-scl70: anti-topoisomerase I, anti-Sm: anti-Smith, anti-dsDNA: Anti-double stranded DNA and ACPA; Anti-citrullinated protein antibodies.
