# Supplementary material for: Disease evolution in mixed connective tissue disease: results from a long-term nationwide prospective cohort study
Source: Springer Nature journal article supplement (doi:10.1186/s13075-017-1494-7), 2017-12-01
Supplement: MOESM2 [file 15327370]

**Additional file 2:** Auto-antibodies at Time point 2 in 118 MCTD patients

| <b>Antibody status at time point 2*</b>        | <b>Stable MCTD phenotype<br/>N = 104</b> | <b>Diagnostic converters<br/>N = 14</b> |
|------------------------------------------------|------------------------------------------|-----------------------------------------|
| Anti-RNP antibodies                            | 78 (75)                                  | 7 (50)                                  |
| Anti-RNP, U/mL, Mdn (IQR)                      | 61 (9 – 240)                             | 15 (3 – 37)                             |
| Anti-dsDNA antibodies**                        | 3 (3)                                    | 6 (43)                                  |
| Anti-Sjögrens Syndrome antigen A (anti-SSA)    | 18 (17)                                  | 6 (43)                                  |
| Anti-Sjögrens Syndrome antigen B (anti-SSB)    | 4 (4)                                    | 1 (7)                                   |
| Anti-topoisomerase I (anti-scl70)              | 0                                        | 1 (7)                                   |
| Anti-centromere protein-B (ACA)                | 0                                        | 3 (21)                                  |
| Anti-histidyl-tRNA synthetase (anti-Jo1)       | 0                                        | 2 (14)                                  |
| Anti-Smith (anti-Sm)**                         | 7 (7)                                    | 1 (7)                                   |
| Low complements                                | 6 (6)                                    | 6 (43)                                  |
| Anti-citrullinated protein antibodies (ACPA)** | 5 (5)                                    | 4 (29)                                  |

\*presented as N (%) unless otherwise specified. \*\*The patients categorized as stable MCTD patients had only weakly positive anti-dsDNA antibodies, anti-Smith antibodies or anti-citrullinated protein antibodies, combined with strongly positive anti-RNP antibodies in addition to MCTD features. Weakly positive anti-dsDNA antibodies, anti-Smith antibodies or low complements did not occur together in the patients categorized as stable MCTD patients.
