# Supplementary material for: Disease evolution in mixed connective tissue disease: results from a long-term nationwide prospective cohort study
Source: Springer Nature journal article supplement (doi:10.1186/s13075-017-1494-7), 2017-12-01
Supplement: MOESM3 [file 15327370]

**Additional file 3: SLEDAI-2K in 104 MCTD patients at Time point 1 and 2**

| Descriptor                               | T1<br>(last 10 days) | Between T1 and<br>T2 | T2<br>(last 10 days) |
|------------------------------------------|----------------------|----------------------|----------------------|
| Recent onset seizure, N (%)              | 0                    | 0                    | 0                    |
| Psychosis, N (%)                         | 0                    | 0                    | 0                    |
| Organic Brain Syndrome, N (%)            | 0                    | 0                    | 0                    |
| Visual Disturbance, N (%)                | 0                    | 0                    | 0                    |
| New onset Cranial Nerve Disorder , N (%) | 0                    | 2 (2)                | 0                    |
| Lupus Headache, N (%)                    | 0                    | 0                    | 0                    |
| New cerebrovascular accident, N (%)      | 0                    | 0                    | 0                    |
| Vasculitis, N (%)                        | 0                    | 0                    | 0                    |
| Arthritis, N (%)                         | 26 (25)              | 20 (19)              | 11 (11)              |
| Myositis, N (%)                          | 8 (8)                | 1 (1)                | 1 (1)                |
| Urinary casts, N (%)                     | 0                    | 2 (2)                | 0                    |
| Hematuria, N (%)                         | 0                    | 4 (4)                | 0                    |
| Proteinuria, N (%)                       | 1                    | 4 (4)                | 1 (1)                |
| Pyuria, N (%)                            | 0                    | 3 (3)                | 0                    |
| Rash, N (%)                              | 29 (28)              | 20 (19)              | 16 (15)              |
| Alopecia, N (%)                          | 13 (13)              | 3 (3)                | 4 (4)                |
| Mucosal ulcers, N (%)                    | 0                    | 4 (4)                | 0                    |
| Pleurisity, N (%)                        | 0                    | 6 (6)                | 0                    |
| Pericarditis, N (%)                      | 1 (1)                | 4 (4)                | 0                    |
| Low complements, N (%)                   | 7 (7)                | 0                    | 6 (6)                |
| Positive dsDNA, N (%)                    | 3 (3)                | 0                    | 3 (3)                |
| Fever, N (%)                             | 0                    | 0                    | 0                    |
| Thrombocytopenia, N (%)                  | 4 (4)                | 4 (4)                | 5 (5)                |
| Leukopenia, N (%)                        | 7 (7)                | 12 (12)              | 3 (3)                |
| SLEDAI-2K score, median (Q1-Q3)          | 2 (0-4)              | 1 (0-4)              | 0 (0-2)              |
| SLEDAI-2K = 0, N (%)                     | 36 (35)              | 50 (48)              | 63 (61)              |

T1: Time point 1, T2: Time point 2
