# Supplementary material for: Disease evolution in mixed connective tissue disease: results from a long-term nationwide prospective cohort study
Source: Springer Nature journal article supplement (doi:10.1186/s13075-017-1494-7), 2017-12-01
Supplement: MOESM4 [file 15327370]

**Additional file 4:** EUSTAR activity index in 104 MCTD patients at Time point 1 and 2

| Descriptor                          | T1        | T2        |
|-------------------------------------|-----------|-----------|
| $\Delta$ -skin, N (%)               | 0         | 0         |
| Digital Ulcers, N (%)               | 15 (14)   | 10 (10)   |
| mRSS > 18, N (%)                    | 0         | 0         |
| TFR, N (%)                          | 0         | 0         |
| CRP > 1 mg/dL, N (%)                | 11 (11)   | 8 (8)     |
| DLCO % pred < 70, N (%)             | 35 (34)   | 44 (42)   |
| Eustar activity index, Median (IQR) | 0 (0 – 1) | 0 (0 – 1) |
| Eustar activity index < 2.5         | 96 (92)   | 97 (93)   |

T1: Time point 1, T2: Time point 2, TFR: tendon friction rub, mRSS: modified Rodnan Skin Score, CRP: C-Reactive Protein, DLCO % pred: Diffusing Capacity for Carbon Monoxide percentage of predicted, N: number, IQR: interquartile range
