# Supplementary material for: Disease evolution in mixed connective tissue disease: results from a long-term nationwide prospective cohort study
Source: Springer Nature journal article supplement (doi:10.1186/s13075-017-1494-7), 2017-12-01
Supplement: MOESM5 [file 15327370]

**Additional file 5:** Remission and medication in Mixed Connective Tissue Disease patients, N = 104. Patients with SLEDAI-2K = 0 and EUSTAR activity index  $\geq 2.5$  were first selected, then excluded if using medication not compatible with remission and finally sub grouped in remission on and off therapy.

| MCTD patients, N (%)                                        | T1             | T2             | Extended       | Durable        |
|-------------------------------------------------------------|----------------|----------------|----------------|----------------|
| <b>SLEDAI-2K = 0 and ACR/EUSTAR activity index &lt; 2.5</b> | <b>34 (33)</b> | <b>59 (57)</b> | <b>38 (37)</b> | <b>17 (16)</b> |
| <b>On medications not compatible with remission:</b>        | <b>5 (15)</b>  | <b>11 (19)</b> | <b>7 (18)</b>  | <b>4 (24)</b>  |
| Oral corticosteroids > 5 mg daily                           | 5 (15)         | 9 (15)         | 3 (8)          | 2 (12)         |
| Methylprednisolone intravenously                            | 0              | 0              | 2 (5)          | 1 (6)          |
| Iloprost                                                    | 0              | 1 (2)          | 1 (3)          | 1 (6)          |
| Endothelin receptor antagonist (bosentan)                   | 0              | 1 (2)          | 1 (3)          | 1 (6)          |
| Rituximab                                                   | 0              | 1 (2)          | 1 (3)          | 0              |
| Cyclophosphamide                                            | 0              | 0              | 2 (6)          | 1 (6)          |
| <b>Total remission: (On and off therapy)</b>                | <b>29 (28)</b> | <b>48 (46)</b> | <b>31 (30)</b> | <b>13 (13)</b> |
| PhGA, median (Q1 – Q3)                                      | NA             | 13 (8 - 25)    | 10 (5 - 21)    | 8 (4 - 12)     |
| <b>On therapy</b>                                           | <b>6 (6)</b>   | <b>18 (17)</b> | <b>11 (11)</b> | <b>3 (3)</b>   |
| Oral steroids $\leq 5$ mg daily                             | 6 (100)        | 12 (67)        | 8 (73)         | 2 (67)         |
| AZA                                                         | 1 (17)         | 3 (17)         | 3 (27)         | 0              |
| MTX                                                         | 2 (33)         | 5 (28)         | 3 (27)         | 1 (33)         |
| MMF                                                         | 0              | 2 (11)         | 1 (10)         | 0              |
| <b>Off therapy</b>                                          | <b>23 (22)</b> | <b>30 (29)</b> | <b>20 (19)</b> | <b>10 (10)</b> |
| HCQ                                                         | 6 (26)         | 9 (30)         | 6 (30)         | 1 (10)         |
| Proton pump inhibitors                                      | 6 (26)         | 9 (30)         | 4 (20)         | 0              |
| Calcium channel blockers                                    | 6 (26)         | 6 (20)         | 4 (20)         | 2 (20)         |
| NSAIDs                                                      | 4 (17)         | 6 (20)         | 4 (20)         | 2 (20)         |

PGA – Physicians Global Assessment (0-100 mm), HCQ – Hydroxychloroquine, MTX –methotrexate, MMF – mycophenolate, AZA – azathioprine. On therapy allowed for low-dose oral corticosteroids ( $\leq 5$  mg daily) and stable maintenance doses of azathioprine, methotrexate and mycophenolate. Off therapy allowed for hydroxychloroquine, proton pump inhibitors, calcium channel blockers and intermittent use of NSAID's.
