# Supplementary material for: Disease evolution in mixed connective tissue disease: results from a long-term nationwide prospective cohort study
Source: Springer Nature journal article supplement (doi:10.1186/s13075-017-1494-7), 2017-12-01
Supplement: MOESM6 [file 15327370]

**Additional file 6:** Univariable logistic regression analyses for remission at Time point 2, “extended remission” and “durable remission”

| Clinical features and treatment at T1 | Remission at follow-up (T2) <sup>1</sup><br>(n=48) |             |         | Extended remission <sup>1</sup><br>(n= 31) |             |         | Durable remission <sup>1</sup><br>(n=13) |             |         |
|---------------------------------------|----------------------------------------------------|-------------|---------|--------------------------------------------|-------------|---------|------------------------------------------|-------------|---------|
|                                       | OR                                                 | 95% CI      | P value | OR                                         | 95 % CI     | P value | OR                                       | 95 % CI     | P value |
| Muscle weakness <sup>2</sup>          | .51                                                | .23 - 1.13  | .095    | -                                          | -           | >.250   | .19                                      | .04 - .93   | .040*   |
| Elevated CK levels <sup>2</sup>       | 2.30                                               | 1.02 - 5.17 | .044*   | 2.32                                       | .98-5.48    | .055    | -                                        | -           | >.250   |
| Facial erythema <sup>2</sup>          | .50                                                | .23 – 1.11  | .088    | -                                          | -           | >.250   | .21                                      | .04 - 1.10  | .052    |
| Alopecia <sup>2</sup>                 | .49                                                | .20 – 1.22  | .124    | -                                          | -           | >.250   | .21                                      | .03- 1.68   | .141    |
| Digital ulcers <sup>2</sup>           | -                                                  | -           | >.250   | .31                                        | .11-.84     | .021*   | -                                        | -           | >.250   |
| Pleuritis <sup>2</sup>                | -                                                  | -           | >.250   | .39                                        | .08 – 1.87  | .238    | -                                        | -           | >.250   |
| Pericarditis <sup>2</sup>             | -                                                  | -           | >.250   | .24                                        | .03 – 1.96  | .181    | -                                        | -           | >.250   |
| FVC % pred (pr 10%)                   | 1.37                                               | 1.06 – 1.78 | .017*   | 1.50                                       | 1.12 – 2.03 | .007**  | 1.54                                     | 1.03 -2.31  | .036    |
| Thrombocytopenia <sup>2</sup>         | .053                                               | .01 - .42   | .005**  | .12                                        | .02 - .94   | .043*   | -                                        | -           | >.250   |
| Remission at T1 <sup>1</sup>          | 2.73                                               | 1.04 – 7.16 | .042*   | 2.20                                       | .84 – 5.76  | .109    | -                                        | -           | NA      |
| NSAID                                 | .33                                                | .14 - .81   | .016*   | .33                                        | .11 - .95   | .041*   | .16                                      |             | .086    |
| Calcium channel blockers              | -                                                  | -           | >.250   | .36                                        | .13 – 1.00  | .049*   | .32                                      | .07 – 1.53  | .153    |
| Methotrexate                          | -                                                  | -           | >.250   | .13                                        | .02 – 1.02  | .053    | .33                                      | .10 – 1.11  | .074    |
| Hydroxychloroquine                    | -                                                  | -           | >.250   | .45                                        | .18 – 1.13  | .088    | .25                                      | .05 – 1.21  | .085    |
| Age of debut (pr year)                | 1.03                                               | 1.00 – 1.05 | .075    | 1.03                                       | 1.00 – 1.06 | .045*   | -                                        | -           | >.250   |
| Negative anti-RNP antibodies          | -                                                  | -           | >.250   | -                                          | -           | >.250   | 2.96                                     | .78 – 11.27 | .111    |
| Anti-U1-70 kDa positive               | -                                                  | -           | >.250   | -                                          | -           | >.250   | .31                                      | .09 – 1.10  | .069    |
| Anti-U1-A positive                    | -                                                  | -           | >.250   | -                                          | -           | >.250   | .34                                      | .09 – 1.20  | .094    |

<sup>1</sup>includes patients in remission both on and off therapy – medications allowed: hydroxychloroquine, proton pump inhibitors, calcium channel blockers, intermittent use of NSAID’s, low-dose oral corticosteroids ( $\leq$  5 mg daily) and stable maintenance doses of azathioprine, methotrexate and mycophenolate. <sup>2</sup>Ever present at T1, \* significant, \*\*highly significant, CK: Creatine Kinase, FVC: Forced Vital Capacity, NSAID’s: Non steroidal anti -inflammatory drugs, anti-RNP: anti-ribonucleoprotein, OR: Odds Ratio, CI: Confidence Interval, T1: Time point 1
